# Supplementary material for: Valorization of BaCO3 with 8-HQS to produce the optical chemo-probe for highly selective sensing of Cd2+ in aqueous media
Source: Royal Society of Chemistry journal article supplement (doi:10.1039/d6ra01012a), 2026-05-06
Supplement: d6ra01012a1.pdf [file d6ra01012a1.pdf]

# Valorization of BaCO<sub>3</sub> with 8-HQS to Produce the Optical Chemo-Probe for Highly Selective Sensing of Cd<sup>2+</sup> in Aqueous Media

*Sahel Sharifi<sup>1</sup>, Amin Moghaddasfar<sup>1</sup>, Ghodsi Mohammadi Ziarani<sup>2</sup>, Alireza Badiei<sup>1\*</sup>*

1. School of Chemistry, College of Sciences, University of Tehran, Iran

2. Department of Organic Chemistry, Faculty of Chemistry, Alzahra University, Iran

\* E-mail address: [abadiei@ut.ac.ir](mailto:abadiei@ut.ac.ir)

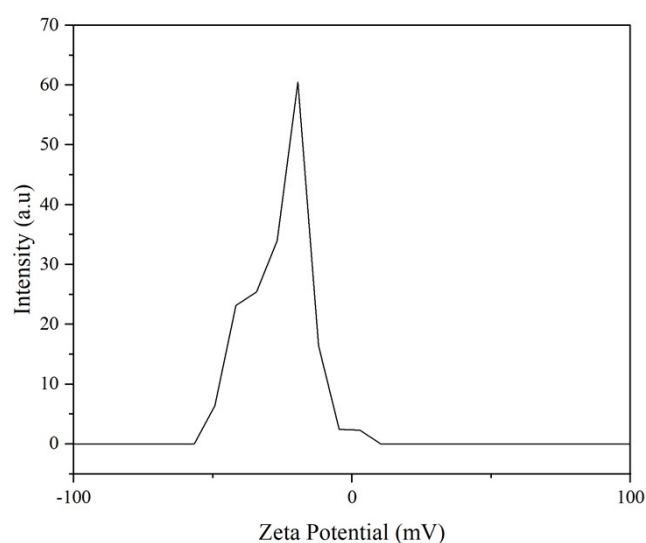

**Figure S1.** Zeta potential of BaCO<sub>3</sub>-8-HQS.

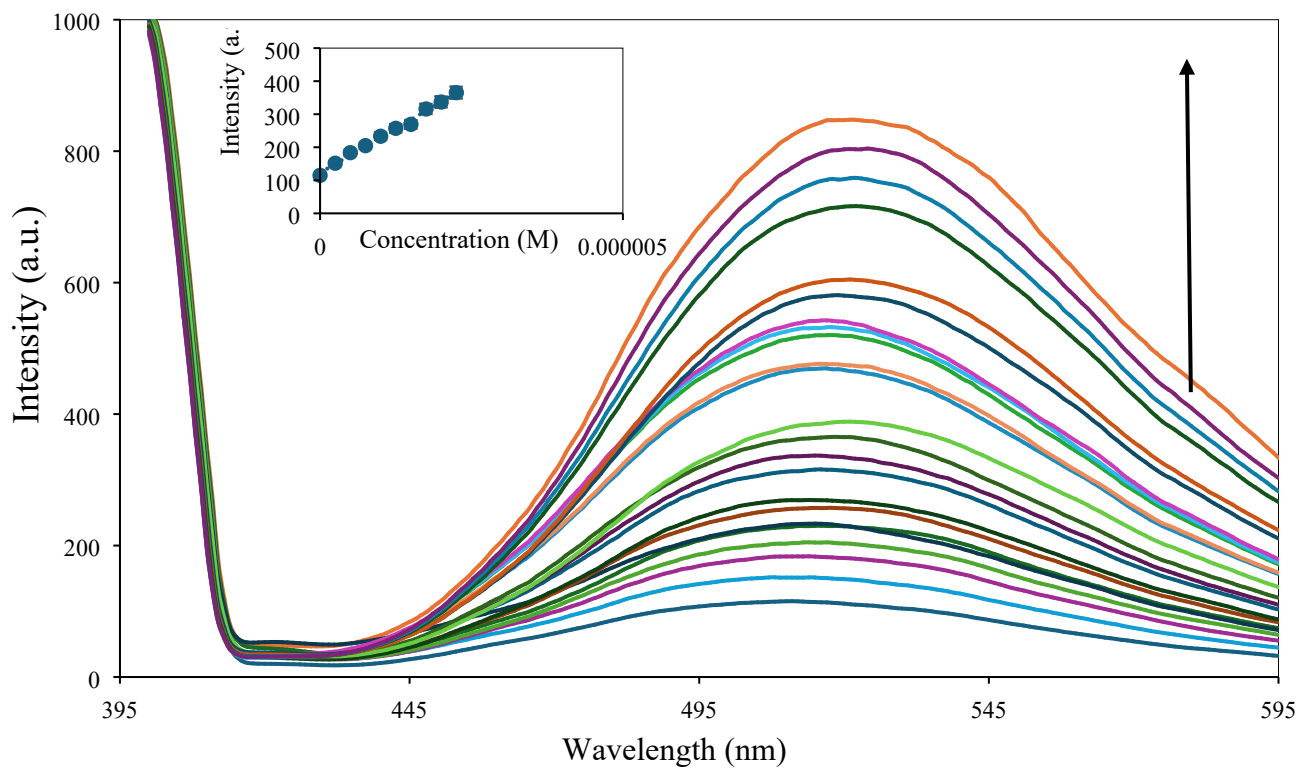

**Figure S2.** The titration plot of BaCO<sub>3</sub>-8-HQS through the addition of Cd<sup>2+</sup> ( $\lambda_{\text{ex}} = 392 \text{ nm}$ ).

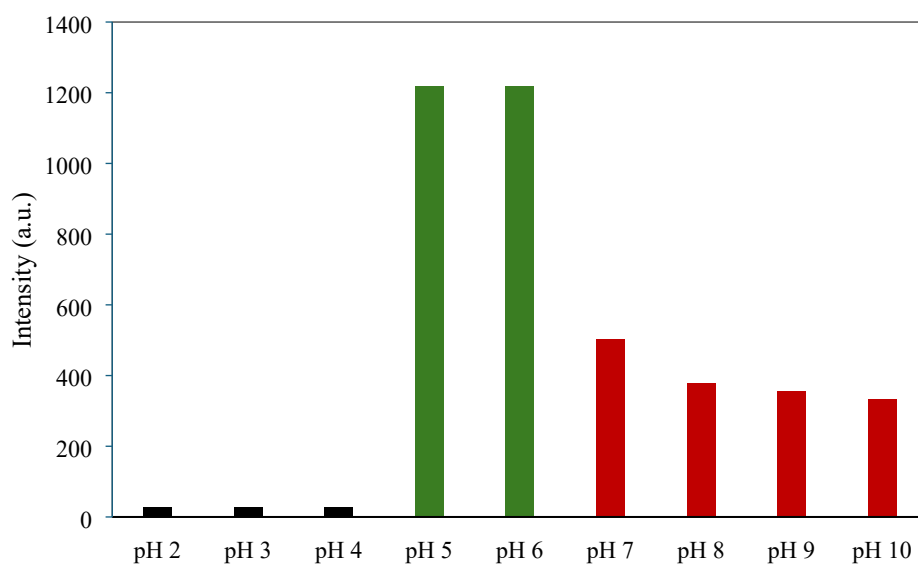

**Figure S3.** The emission intensity of BaCO<sub>3</sub>-8-HQS-Cd<sup>2+</sup> in a variety of pH ranges
